# Supplementary material
Source: HighWire-hosted journal article supplement (https://bmjopen.bmj.com/content/6/3/e008805)
Supplement: inline-supplementary-material-1 [file inline-supplementary-material-1.pdf]

**Appendix 1 Bivariate analysis of factors associated with blood pressure and hypertension risk in urban South African black participants aged 18 years (n=838)**

| Exposure variables                 | SBP     |                |                  | DBP     |               |                  | MAP     |               |                  | Hypertension risk |                           |                  |
|------------------------------------|---------|----------------|------------------|---------|---------------|------------------|---------|---------------|------------------|-------------------|---------------------------|------------------|
|                                    | $\beta$ | 95% CI         | p value          | $\beta$ | 95% CI        | p value          | $\beta$ | 95% CI        | p value          | OR                | 95% CI                    | P value          |
| <b>SES change</b>                  |         |                |                  |         |               |                  |         |               |                  |                   |                           |                  |
| <i>Low-low (ref)</i>               |         |                |                  |         |               |                  |         |               |                  | 1                 |                           |                  |
| <i>Low-medium</i>                  | -0.89   | -3.34 to 1.56  | 0.474            | -0.39   | -2.38 to 1.60 | 0.702            | -0.54   | -2.47 to 1.40 | 0.586            | 0.95              | 0.51 to 1.77              | 0.865            |
| <i>Low-high</i>                    | -4.94   | -8.64 to -1.23 | <b>&lt;0.001</b> | -2.24   | -5.26 to 0.77 | 0.144            | -2.78   | -5.71 to 0.14 | 0.062            | 0.14              | 0.02 to 1.06              | 0.057            |
| <i>Medium-low</i>                  | -0.13   | -2.56 to 2.30  | 0.916            | 1.12    | -0.86 to 3.10 | 0.266            | 0.61    | -1.31 to 2.53 | 0.534            | 0.79              | 0.41 to 1.52              | 0.478            |
| <i>Medium-Medium</i>               | -1.39   | -4.15 to 1.36  | 0.321            | -0.34   | -2.58 to 1.90 | 0.765            | -1.15   | -3.33 to 1.03 | 0.301            | 0.79              | 0.37 to 1.65              | 0.526            |
| <i>Medium-high</i>                 | 0.50    | -2.88 to 3.89  | 0.771            | -0.23   | -2.99 to 2.52 | 0.869            | -1.16   | -2.83 to 2.52 | 0.909            | 0.63              | 0.24 to 1.69              | 0.361            |
| <i>High-low</i>                    | -2.29   | -4.95 to 0.36  | 0.091            | -1.69   | -3.85 to 0.47 | 0.125            | -1.63   | -3.73 to 0.47 | 0.128            | 0.79              | 0.38 to 1.61              | 0.512            |
| <i>High-Medium</i>                 | -0.23   | -2.85 to 2.39  | 0.865            | 1.02    | -1.11 to 3.15 | 0.348            | 0.63    | -1.44 to 2.70 | 0.548            | 1.00              | 0.52 to 1.94              | 0.995            |
| <i>High-high</i>                   | -2.31   | -4.95 to 0.34  | 0.087            | -0.41   | -2.56 to 1.74 | 0.711            | -1.21   | -3.30 to 0.88 | 0.256            | 0.62              | 0.29 to 1.33              | 0.216            |
| <b>Participant characteristics</b> |         |                |                  |         |               |                  |         |               |                  |                   |                           |                  |
| <b>Childhood</b>                   |         |                |                  |         |               |                  |         |               |                  |                   |                           |                  |
| Gestational age, weeks             | 0.01    | -0.37 to 0.41  | 0.943            | 0.03    | -0.28 to 0.35 | 0.836            | 0.03    | -0.27 to 0.34 | 0.826            | 0.97              | 0.88 to 1.07              | 0.559            |
| Birth weight, kg                   | 0.40    | -0.98 to 1.78  | 0.568            | -0.12   | -1.24 to 1.01 | 0.836            | 0.00    | -1.09 to 1.09 | 0.999            | 0.96              | 0.67 to 1.40              | 0.861            |
| Small-for-Gestational age(SGA),%   |         |                |                  |         |               |                  |         |               |                  |                   |                           |                  |
| <i>No(ref)</i>                     |         |                |                  |         |               |                  |         |               |                  | 1                 |                           |                  |
| <i>Yes</i>                         | 2.02    | -0.16 to 4.19  | 0.069            | -0.05   | -1.83 to 1.74 | 0.96             | 0.76    | -0.95 to 2.48 | 0.383            | 1.56              | 0.92 to 2.66              | 0.099            |
| <b>Adolescence</b>                 |         |                |                  |         |               |                  |         |               |                  |                   |                           |                  |
| Age, years                         | 2.81    | 0.98 to 4.65   | <b>&lt;0.001</b> | -1.1    | -2.61 to 0.40 | 0.15             | 0.11    | -1.35 to 1.56 | 0.887            | 1.41              | 0.86 to 2.30              | 0.172            |
| Sex                                |         |                |                  |         |               |                  |         |               |                  |                   |                           |                  |
| <i>Boys(ref)</i>                   |         |                |                  |         |               |                  |         |               |                  | 1                 |                           |                  |
| <i>Girls</i>                       | -6.10   | -7.41 to -4.77 | <b>&lt;0.001</b> | 1.19    | 0.07 to 2.31  | <b>0.04</b>      | -0.81   | -1.90 to 0.27 | 0.142            | 1.00              | 0.69 to 1.45              | 0.99             |
| Alcohol intake                     |         |                |                  |         |               |                  |         |               |                  |                   |                           |                  |
| <i>No</i>                          |         |                |                  |         |               |                  |         |               |                  | 1                 |                           |                  |
| <i>Yes</i>                         | -1.05   | -2.40 to 0.31  | 0.131            | -0.23   | -1.38 to 0.93 | 0.701            | -0.50   | -1.61 to 0.61 | 0.378            | 0.81              | 0.57 to 1.16              | 0.259            |
| Smoking                            |         |                |                  |         |               |                  |         |               |                  |                   |                           |                  |
| <i>No</i>                          |         |                |                  |         |               |                  |         |               |                  | 1                 |                           |                  |
| <i>Yes</i>                         | -1.29   | -2.69 to 0.11  | 0.071            | 0.93    | 2.41 to 0.55  | 0.217            | -1.06   | -2.69 to 0.57 | 0.201            | 0.72              | 0.44 to 1.19              | 0.203            |
| Weight at age 18yrs, kg            | 0.25    | 0.19 to 0.30   | <b>&lt;0.001</b> | 0.12    | 0.07 to 0.17  | <b>&lt;0.001</b> | 0.17    | 0.13 to 0.22  | <b>&lt;0.001</b> | 1.04              | 1.02 to 1.06 <sup>3</sup> | <b>&lt;0.001</b> |
| Height at age 18yrs,cm             | 0.35    | 0.27 to 0.42   | <b>&lt;0.001</b> | 0.00    | -0.07 to 0.06 | 0.888            | 0.10    | 0.04 to 0.17  | <b>&lt;0.01</b>  | 0.99              | 0.97 to 1.01              | 0.236            |

|                                  |      |               |                  |      |               |                  |      |               |                  |      |              |                  |
|----------------------------------|------|---------------|------------------|------|---------------|------------------|------|---------------|------------------|------|--------------|------------------|
| Relative weight gain (0-2years)  | 0.87 | 0.15 to 1.59  | <b>0.02</b>      | 0.45 | -0.14 to 1.04 | 0.135            | 0.56 | 0.00 to 1.13  | 0.051            | 1.13 | 0.94 to 1.38 | 0.194            |
| Relative weight gain (2-4years)  | 0.64 | -0.02 to 1.30 | 0.058            | 0.12 | -0.42 to 0.66 | 0.652            | 0.48 | -0.04 to 1.00 | 0.068            | 1.28 | 1.07 to 1.55 | <b>&lt;0.01</b>  |
| Relative weight gain (4-18years) | 2.56 | 1.86 to 3.26  | <b>&lt;0.001</b> | 1.29 | 0.71 to 1.87  | <b>&lt;0.001</b> | 1.77 | 1.22 to 2.32  | <b>&lt;0.001</b> | 1.59 | 1.30 to 1.93 | <b>&lt;0.001</b> |

**Appendix 2 Additional multivariate analyses of factors associated with blood pressure and hypertension risk in urban South African black participants aged 18 years.**

|                                  | SBP <sup>1</sup> (n=655) |          |         | DBP <sup>1</sup> (n=655) |          |         | MAP <sup>1</sup> (n=655) |              |         | Hypertension risk <sup>2</sup> (n=653) |          |              |      |      |      |              |
|----------------------------------|--------------------------|----------|---------|--------------------------|----------|---------|--------------------------|--------------|---------|----------------------------------------|----------|--------------|------|------|------|--------------|
|                                  | $\beta$                  | 95% (CI) | p value | $\beta$                  | 95% (CI) | p value | $\beta$                  | 95% (CI)     | p value | Odds Ratio                             | 95% (CI) | P value      |      |      |      |              |
| SES change                       |                          |          |         |                          |          |         |                          |              |         |                                        |          |              |      |      |      |              |
| <i>Low-low(ref)</i>              |                          |          |         |                          |          |         |                          |              |         |                                        |          |              |      |      |      |              |
| <i>Low-medium</i>                | -1.35                    | -4.19    | 1.49    | 0.350                    | -0.60    | -3.12   | 1.92                     | 0.639        | -0.86   | -3.27                                  | 1.55     | 0.482        | 0.61 | 0.28 | 1.34 | 0.215        |
| <i>Low-high</i>                  | -4.78                    | -8.92    | -0.65   | <b>0.024</b>             | -0.34    | -4.02   | 3.33                     | 0.855        | -1.77   | -5.28                                  | 1.73     | 0.321        | 0.27 | 0.06 | 1.23 | 0.091        |
| <i>Medium-low</i>                | -0.85                    | -4.38    | 2.67    | 0.634                    | 0.98     | -2.16   | 4.11                     | 0.540        | 0.35    | -2.64                                  | 3.34     | 0.820        | 0.56 | 0.22 | 1.45 | 0.232        |
| <i>Medium-Medium</i>             | -3.64                    | -7.59    | 0.32    | 0.071                    | -1.69    | -5.21   | 1.82                     | 0.344        | -2.37   | -5.72                                  | 0.99     | 0.166        | 0.45 | 0.15 | 1.35 | 0.153        |
| <i>Medium-high</i>               | 1.07                     | -3.14    | 5.28    | 0.619                    | 1.19     | -2.56   | 4.93                     | 0.533        | 1.15    | -2.43                                  | 4.72     | 0.528        | 0.64 | 0.20 | 2.05 | 0.458        |
| <i>High-low</i>                  | -4.28                    | -9.26    | 0.71    | 0.093                    | -1.06    | -5.49   | 3.38                     | 0.640        | -2.15   | -6.38                                  | 2.08     | 0.319        | 0.43 | 0.10 | 1.77 | 0.243        |
| <i>High-Medium</i>               | -0.99                    | -5.89    | 3.90    | 0.691                    | 2.81     | -1.54   | 7.16                     | 0.204        | 1.53    | -2.62                                  | 5.69     | 0.469        | 0.46 | 0.12 | 1.75 | 0.254        |
| <i>High-high</i>                 | -3.54                    | -8.76    | 1.68    | 0.184                    | 0.99     | -3.66   | 5.63                     | 0.676        | -0.52   | -4.95                                  | 3.91     | 0.818        | 0.50 | 0.12 | 2.13 | 0.351        |
| Current participant age, yrs     | 2.45                     | 0.26     | 4.64    | <b>0.028</b>             | -1.03    | -2.98   | 0.91                     | 0.298        | 0.14    | -1.71                                  | 2.00     | 0.879        |      |      |      |              |
| Current participant height, cm   | 0.08                     | -0.05    | 0.21    | 0.227                    | -0.02    | -0.13   | 0.10                     | 0.761        | 0.01    | -0.09                                  | 0.12     | 0.808        |      |      |      |              |
| Baseline BP at 5 yrs             | 0.13                     | 0.07     | 0.19    | <b>0.000</b>             | 0.18     | 0.09    | 0.27                     | <b>0.000</b> | 0.16    | 0.08                                   | 0.24     | <b>0.000</b> | 1.38 | 0.84 | 2.29 | 0.204        |
| Household SES in infancy         | 0.29                     | -0.95    | 1.53    | 0.650                    | -0.39    | -1.49   | 0.71                     | 0.489        | -0.16   | -1.21                                  | 0.89     | 0.770        | 1.05 | 0.74 | 1.48 | 0.782        |
| Current alcohol intake           | -0.71                    | -2.31    | 0.90    | 0.386                    | 0.13     | -1.29   | 1.56                     | 0.854        | -0.16   | -1.52                                  | 1.20     | 0.822        | 0.84 | 0.54 | 1.32 | 0.454        |
| Sex                              | -4.98                    | -7.17    | -2.78   | <b>0.000</b>             | 1.26     | -0.71   | 3.22                     | 0.210        | -0.82   | -2.69                                  | 1.05     | 0.390        |      |      |      |              |
| small for gestational age(SGA)   | 2.00                     | -0.45    | 4.45    | 0.109                    | 0.45     | -1.73   | 2.63                     | 0.687        | 0.93    | -1.15                                  | 3.01     | 0.379        | 1.87 | 1.05 | 3.32 | <b>0.033</b> |
| Relative weight gain (0-2years)  | 1.19                     | 0.35     | 2.03    | <b>0.005</b>             | 0.53     | -0.22   | 1.27                     | 0.166        | 0.75    | 0.04                                   | 1.46     | <b>0.039</b> | 1.13 | 0.90 | 1.43 | 0.301        |
| Relative weight gain (2-4years)  | 0.35                     | -0.38    | 1.09    | 0.348                    | 0.32     | -0.33   | 0.97                     | 0.340        | 0.32    | -0.31                                  | 0.94     | 0.319        | 1.21 | 0.98 | 1.48 | 0.072        |
| Relative weight gain (4-18years) | 3.43                     | 2.62     | 4.24    | <b>0.000</b>             | 1.38     | 0.65    | 2.10                     | <b>0.000</b> | 2.06    | 1.37                                   | 2.75     | <b>0.000</b> | 1.61 | 1.28 | 2.03 | <b>0.000</b> |
|                                  | R <sup>2</sup> =0.2014   |          |         | R <sup>2</sup> =0.0544   |          |         | R <sup>2</sup> =0.0823   |              |         | Pseudo R <sup>2</sup> =0.0631          |          |              |      |      |      |              |

<sup>1</sup>Model adjusted for BP measure and SES at baseline, alcohol intake, height and age at 18yrs, sex, growth (SGA, relative weight gain in infancy and mi-childhood)

<sup>2</sup>Model adjusted for BP measure and SES at baseline, alcohol intake at 18yrs, growth (SGA, relative weight gain in infancy and mi-childhood)
